# Supplementary material for: A new, practicable and economical cage design for experimental studies on small honey bee colonies
Source: Oxford University Press journal article supplement (doi:10.1242/jeb.200998), 2019-01-01
Supplement: jeb200998supp.pdf [file jeb200998supp.pdf]

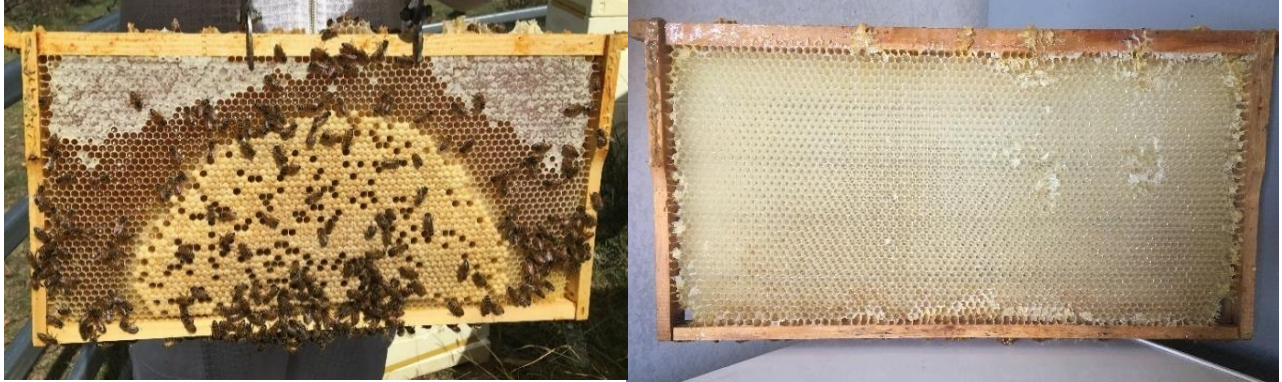

**Figure S1. Brood frame (left) and frame with wax comb used to replace brood frame (right)**

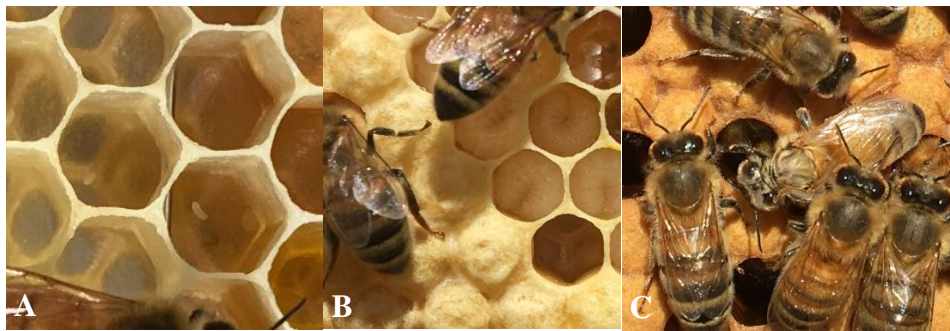

**Figure S2. Honey bee brood of colony 1 showing (A) eggs, (B) larvae (top right) and pupae covered with capping (bottom left), and (C) juvenile adult (centre).**

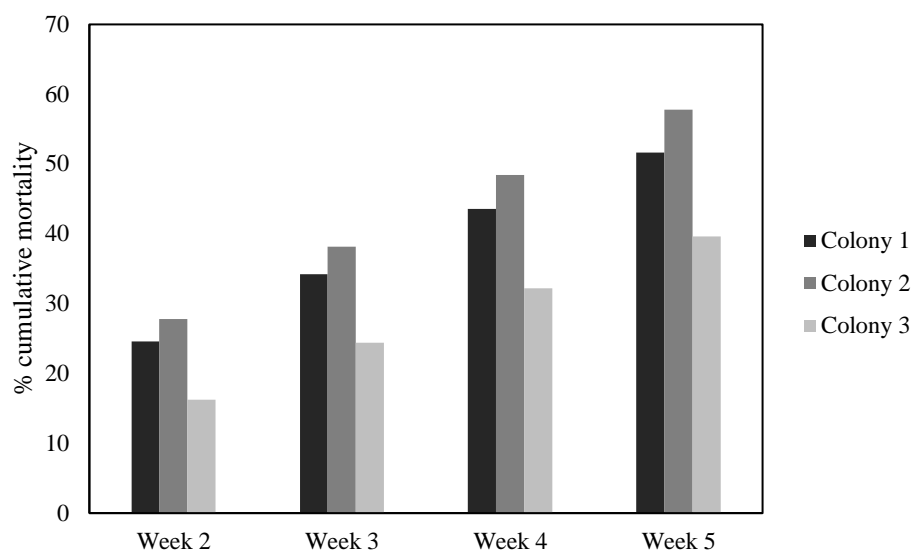

**Figure S3. Graph showing % cumulative mortality for each colony.**
